# Supplementary material for: Bacteriophage-Host Association in the Phytoplasma Insect Vector Euscelidius variegatus
Source: MDPI journal article supplement (doi:10.3390/pathogens10050612), 2021-05-17
Supplement: s1 [file s1]

## Supplementary Materials

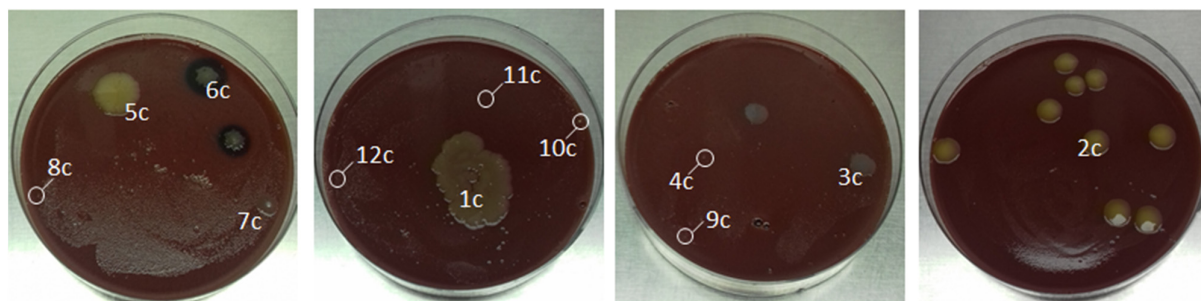

(a)

| Colony name | Day of appearance | Colony aspect                                     | Positive for EVP-1 |
|-------------|-------------------|---------------------------------------------------|--------------------|
| 1C          | 1-3               | pale yellow, irregular, flat, undulate margin     |                    |
| 2C          | 1-3               | bright yellow, circular, raised, smooth margin    |                    |
| 3C          | 1-3               | white, irregular, flat, undulate margin           |                    |
| 4C          | 7-10              | white transparent, circular, tiny                 | x                  |
| 5C          | 1-3               | bright yellow, circular, raised, irregular margin |                    |
| 6C          | 1-3               | white, irregular, flat, lobate margin, black halo |                    |
| 7C          | 1-3               | white, irregular, umbonate, lobate margin,        |                    |
| 8C          | 7-10              | white transparent, circular, tiny                 | x                  |
| 9C          | 7-10              | white transparent, circular, tiny                 | x                  |
| 10C         | 7-10              | yellow, circular, tiny                            |                    |
| 11C         | 7-10              | white transparent, circular, tiny                 |                    |
| 12C         | 7-10              | white transparent, circular, tiny                 | x                  |
| 13C         | 7-10              | white transparent, circular, tiny                 | x                  |
| 14C         | 7-10              | white transparent, circular, tiny                 | x                  |
| 15C         | 7-10              | white transparent, circular, tiny                 | x                  |
| 1P          | 1-3               | orange, circular, raised, lobate margin           |                    |
| 2P          | 1-3               | pale yellow, irregular, flat, smooth margin       |                    |
| 3P          | 7-10              | white transparent, circular, tiny                 | x                  |
| 4P          | 7-10              | white transparent, circular, tiny                 | x                  |
| 5P          | 7-10              | white transparent, circular, tiny                 | x                  |

(b)

**Figure S1. (a)** Examples of chocolate agar plates with colonies grown after plating hemolymph extracted from *Euscelidius variegatus* Torino population. **(b)** List and characteristics of all the isolated colonies from chocolate (C) and purple (P) agar plates; positivity to EVP-1 was determined by PCR with EVP-1 primers.

|            |                                                              |     |
|------------|--------------------------------------------------------------|-----|
| Z14096.1   | -----CATGGCTCAGATTGAACGCTGGCGGCAGGCCTAACACATGCAAGTCGAGC      | 50  |
| 16S_colony | AGAGTTTGATCATGGCTCAGATTGAACGCTGGCGGCAGGCCTAACACATGCAAGTCGAGC | 60  |
|            | *****                                                        |     |
| Z14096.1   | GGTAGCACAAAGGAGCTTGCTCCCCGGGTGACGAGCGGCGGACGGGTGAGTAGTGTCTGG | 110 |
| 16S_colony | GGTAGCACAAAGGAGCTTGCTCCCCGGGTGACGAGCGGCGGACGGGTGAGTAGTGTCTGG | 120 |
|            | *****                                                        |     |
| Z14096.1   | GAAACTGCCTGATGGAGGGGATAACTACTGGAAACGGTAGCTAATACCGCATAACGTCG  | 170 |
| 16S_colony | GAAACTGCCTGATGGAGGGGATAACTACTGGAAACGGTAGCTAATACCGCATAACGTCG  | 180 |
|            | *****                                                        |     |
| Z14096.1   | CAAGACCAAAGTGGGGGACCTTCGGGCCTCACGCCATCAGATGTGCCAGATGGGATTAG  | 230 |
| 16S_colony | CAAGACCAAAGTGGGGGACCTTCGGGCCTCACGCCATCAGATGTGCCAGATGGGATTAG  | 240 |
|            | *****                                                        |     |
| Z14096.1   | CTAGTAGGTGGGGTAACGGCTCACCTAGGCGACGATCCCTAGCTGGTCTGAGAGGATGAC | 290 |
| 16S_colony | CTAGTAGGTGGGGTAACGGCTCACCTAGGCGACGATCCCTAGCTGGTCTGAGAGGATGAC | 300 |
|            | *****                                                        |     |
| Z14096.1   | CAGCCACACTGGAAGTGAACACGGTCCAGACTCCTACGGGAGGCAGCAGTGGGGAATAT  | 350 |
| 16S_colony | CAGCCACACTGGAAGTGAACACGGTCCAGACTCCTACGGGAGGCAGCAGTGGGGAATAT  | 360 |
|            | *****                                                        |     |
| Z14096.1   | TGCACAATGGGCGCAAGCCTGATGCAGCCATGCCGCGTGTGTGAAGAAGGCCTTCGGGTT | 410 |
| 16S_colony | TGCACAATGGGCGCAAGCCTGATGCAGCCATGCCGCGTGTGTGAAGAAGGCCTTCGGGTT | 420 |
|            | *****                                                        |     |
| Z14096.1   | GTAAAGCACTTTCAGCGAGGAGGAAGGCAGTAAGGTTAATAACCTTGCTGATTGACGTTA | 470 |
| 16S_colony | GTAAAGCACTTTCAGCGAGGAGGAAGGCAGTAAGGTTAATAACCTTGCTGATTGACGTTA | 480 |
|            | *****                                                        |     |
| Z14096.1   | CTCGCAGAAGAAGCACCGGCTAACTCCGTGCCAGCAGCCGCGGTAATACGGAGGGTGCAA | 530 |
| 16S_colony | CTCGCAGAAGAAGCACCGGCTAACTCCGTGCCAGCAGCCGCGGTAATACGGAGGGTGCAA | 540 |
|            | *****                                                        |     |
| Z14096.1   | GCGTTAATCGGAATGACTGGGCGTAAAGCGCACGCAGGCGGTTTGTTAAGTTGGATGTGA | 590 |
| 16S_colony | GCGTTAATCGGAATGACTGGGCGTAAAGCGCACGCAGGCGGTTTGTTAAGTTGGATGTGA | 600 |
|            | *****                                                        |     |
| Z14096.1   | AATCCCCGGGCTTAACCTGGGAAACTGCATTCAAACTGGCAAGCTAGAGTCTCGTAGAG  | 650 |

|            |                                                               |      |
|------------|---------------------------------------------------------------|------|
| 16S_colony | AATCCCCGGGCTTAACCTGGG-AACTGCATTCAAACTGGCAAGCTAGAGTCTCGTAGAG   | 659  |
|            | *****                                                         |      |
| Z14096.1   | GGGGGTAGAATTCCAGGTGTAGCGGTGAAATGCGTAGAGATCTGGAGGAATACCGGTGGC  | 710  |
| 16S_colony | GGGGGTAGAATTCCAGGTGTAGCGGTGAAATGCGTAGAGATCTGGAGGAATACCGGTGGC  | 719  |
|            | *****                                                         |      |
| Z14096.1   | GAAGGCGGCCCCCTGGACGAAGACTGACGCTCAGGTGCGAAAGCGTGGGGAGCAAACAGG  | 770  |
| 16S_colony | GAAGGCGGCCCCCTGGACGAAGACTGACGCTCAGGTGCGAAAGCGTGGGGAGCAAACAGG  | 779  |
|            | *****                                                         |      |
| Z14096.1   | ATTAGATACCCTGGTAGTCCACTCTGTAAACGATGTCGATTTGGAGGTTGTGCCCTTGAG  | 830  |
| 16S_colony | ATTAGATACCCTGGTAGTCCACGCTGTAAACGATGTCGATTTGGAGGTTGTGCCCTTGAG  | 839  |
|            | *****                                                         |      |
| Z14096.1   | GCGTGGCTTCCGGACGTAACGCGTTAAATCGACCGCTGGGGAGTACGGCCGCAAGGTT    | 890  |
| 16S_colony | GCGTGGCTTCCGGAGCTAACGCGTTAAATCGACCGCTGGGG-AGTACGGCCGCAAGGTT   | 898  |
|            | *****                                                         |      |
| Z14096.1   | AAAAGTGAAATGAATTGACGGGG-CCGCTACAAGCGGTGGAGCATGTGGTTTAATTCGAT  | 949  |
| 16S_colony | AAAACTCAAATGAATTGACGGGGGCCGCAAGCGGTGGAGCATGTGGTTTAATTCGAT     | 958  |
|            | **** * ***** ** *****                                         |      |
| Z14096.1   | GCAACGCGAAG-ACCTTACCTACTCTTGACATCCAGAGAATTTAGCAGAGATGCTTTAGT  | 1008 |
| 16S_colony | GCAACGCGAAGAACCTTACCTACTCTTGACATCCAGAGAATTTAGCAGAGATGCTTTAGT  | 1018 |
|            | *****                                                         |      |
| Z14096.1   | GC-TTCGGGAACTCTGAGACAGGTGCTGCATGGCTGTCGTCAGCTCGTGTGTGAAATGT   | 1067 |
| 16S_colony | GCCTTCGGGAACTCTGAGACAGGTGCTGCATGGCTGTCGTCAGCTCGTGTGTGAAATGT   | 1078 |
|            | ** *****                                                      |      |
| Z14096.1   | TGGGTTAAGTCCCGCAACGAGCGCAACCCTTATGCTTTGTTGCCAGCGATTTCGGTCGGGA | 1127 |
| 16S_colony | TGGGTTAAGTCCCGCAACGAGCGCAACCCTTATGCTTTGTTGCCAGCGATTTCGGTCGGGA | 1138 |
|            | *****                                                         |      |
| Z14096.1   | ACTCAAAGGAGACTGCCAGTGATAAACTGGAGGAAGGTGGGGATGACGTCAAGTCATCAT  | 1187 |
| 16S_colony | ACTCAAAGGAGACTGCCAGTGATAAACTGGAGGAAGGTGGGGATGACGTCAAGTCATCAT  | 1198 |
|            | *****                                                         |      |
| Z14096.1   | GGCCCTTACGAGTAGGGCTACACACGTGCTACAATGGCGTATACAAAGAGAAGCGACCGC  | 1247 |
| 16S_colony | GGCCCTTACGAGTAGGGCTACACACGTGCTACAATGGCGTATACAAAGAGAAGCGACCTC  | 1258 |

```

***** *

Z14096.1      GCGAGAGCAAGCGGACCTCATAAAGTACGTCGTAGTCCG-ATTGGAGTGTGCAACTCGAC      1306
16S_colony    GCGAGAGCAAGCGGACCTCATAAAGTACGTCGTAGTCCGGATTGGAGTCTGCAACTCGAC      1318
*****

Z14096.1      TCCATGAAGTCGGAATCGCTAGTAATCGTAGATCAGAATGCTACGGTGAATACGTTCCCG      1366
16S_colony    TCCATGAAGTCGGAATCGCTAGTAATCGTAGATCAGAATGCTACGGTGAATACGTTCCCG      1378
*****

Z14096.1      GGCCTTGTACACACCGCCCGTCACACCATGGGAGTGGGTTGCAAAAGAAGTAGGTAGCTT      1426
16S_colony    GGCCTTGTACACACCGCCCGTCACACCATGGGAGTGGGTTGCAAAAGAAGTAGGTAGCTT      1438
*****

Z14096.1      AACCTTCGGGAGGGCGCTTACCACCTTGTGATTCATGACTGGGGTGAAGTCGTAACAAGG      1486
16S_colony    AACCTTCGGGAGGGCGCTTACCACCTTGTGATTCATGACTGGGGTGAAGTCGTAACAAGG      1498
*****

Z14096.1      TAACCGTAGGG----- 1498
16S_colony    TAACCGTAGGGGAACCTGCGGTTGGATCACCTCCTTACCTAATGATACTGATTCTGTGAA      1558
*****

Z14096.1      ----- 1498
16S_colony    GTGTT 1563

```

**Figure S2.** Alignment of the 16S ribosomal sequence of the three colonies with the one from the “Bacterial parasite of *Euscelidius variegatus*” (BEV) GenBank accession number: Z14096; (Campbell and Purcell, 1993)

**Table S1.** Blastn analysis of the 12 selected phage sequences against the BEV sequences submitted to the GenBank Trace Archive

| Trasncript IDs | Length<br>(nt) | hit accession<br>number | hit<br>length | E-<br>value | identities % | query coverage<br>% |
|----------------|----------------|-------------------------|---------------|-------------|--------------|---------------------|
| MW965288       | 768            | gnl ti 2292004869       | 1322          | 0           | 98           | 94                  |
| MW965287       | 1419           | gnl ti 2292004924       | 1177          | 0           | 100          | 63                  |
| MW965291       | 6115           | gnl ti 2292005037       | 1289          | 0           | 99           | 17                  |
| MW965289       | 1777           | gnl ti 2292005093       | 1272          | 0           | 100          | 38                  |
| MW965290       | 5544           | gnl ti 2292005198       | 1211          | 6E-176      | 100          | 6                   |
| MW965282       | 770            | gnl ti 2292005213       | 1160          | 2E-157      | 97           | 42                  |
| MW965292       | 1852           | gnl ti 2292005268       | 1315          | 0           | 88           | 42                  |
| MW965284       | 345            | gnl ti 2292005461       | 1125          | 2E-31       | 95           | 23                  |
| MW965286       | 251            | gnl ti 2292005461       | 1125          | 5E-50       | 98           | 43                  |
| MW965283       | 3268           | gnl ti 2292005498       | 1266          | 0           | 99           | 32                  |
| MW965281       | 2188           | gnl ti 2292005561       | 1072          | 0           | 98           | 46                  |
| MW965285       | 299            | No hits found           |               |             |              |                     |
